# Supplementary material for: Thermal effects on the surface plasmon resonance of Cu nanoparticles in phosphate glass: impact on Cu+ luminescence
Source: Royal Society of Chemistry journal article supplement (doi:10.1039/c8na00385h), 2019-01-01
Supplement: c8na00385h1.pdf [file c8na00385h1.pdf]

## Supporting Information

### Thermal effects on the surface plasmon resonance of Cu nanoparticles in phosphate glass: impact on Cu<sup>+</sup> luminescence

José A. Jiménez \*,<sup>1</sup>

*Department of Chemistry, University of North Florida, Jacksonville, FL 32224, USA*

\* E-mail: [jimenez.materials@gmail.com](mailto:jimenez.materials@gmail.com)

<sup>1</sup> Present address: Functional Films Lab, BASF Corporation, 2655 Route 22 West, Union, NJ 07083, USA

#### ORCID:

José A. Jiménez: [0000-0001-9256-3836](https://orcid.org/0000-0001-9256-3836)

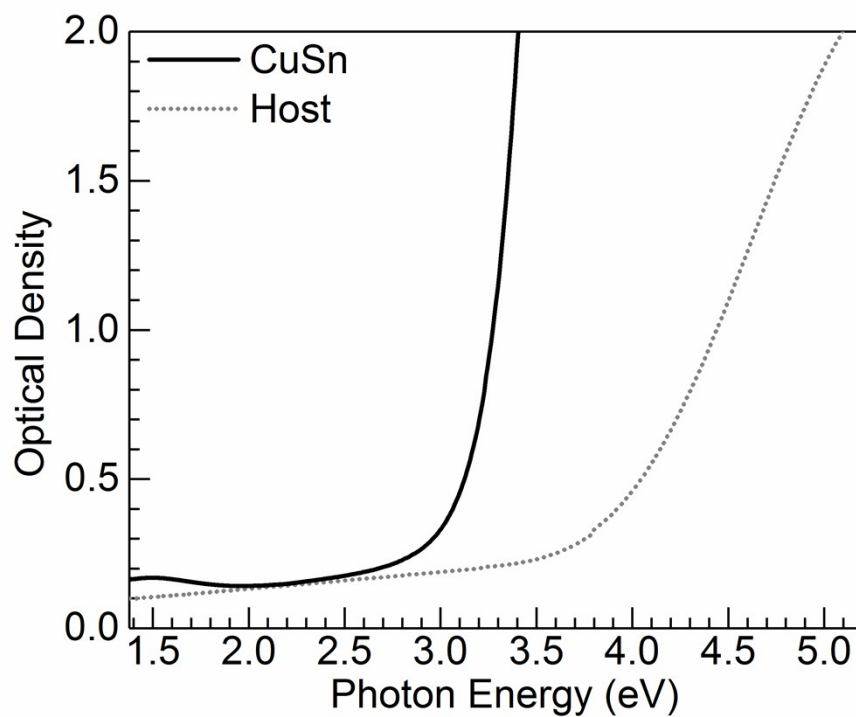

**Fig. S1.** Optical absorption spectrum of the CuSn precursor glass alongside the undoped BaO:P<sub>2</sub>O<sub>5</sub> glass host for comparison.

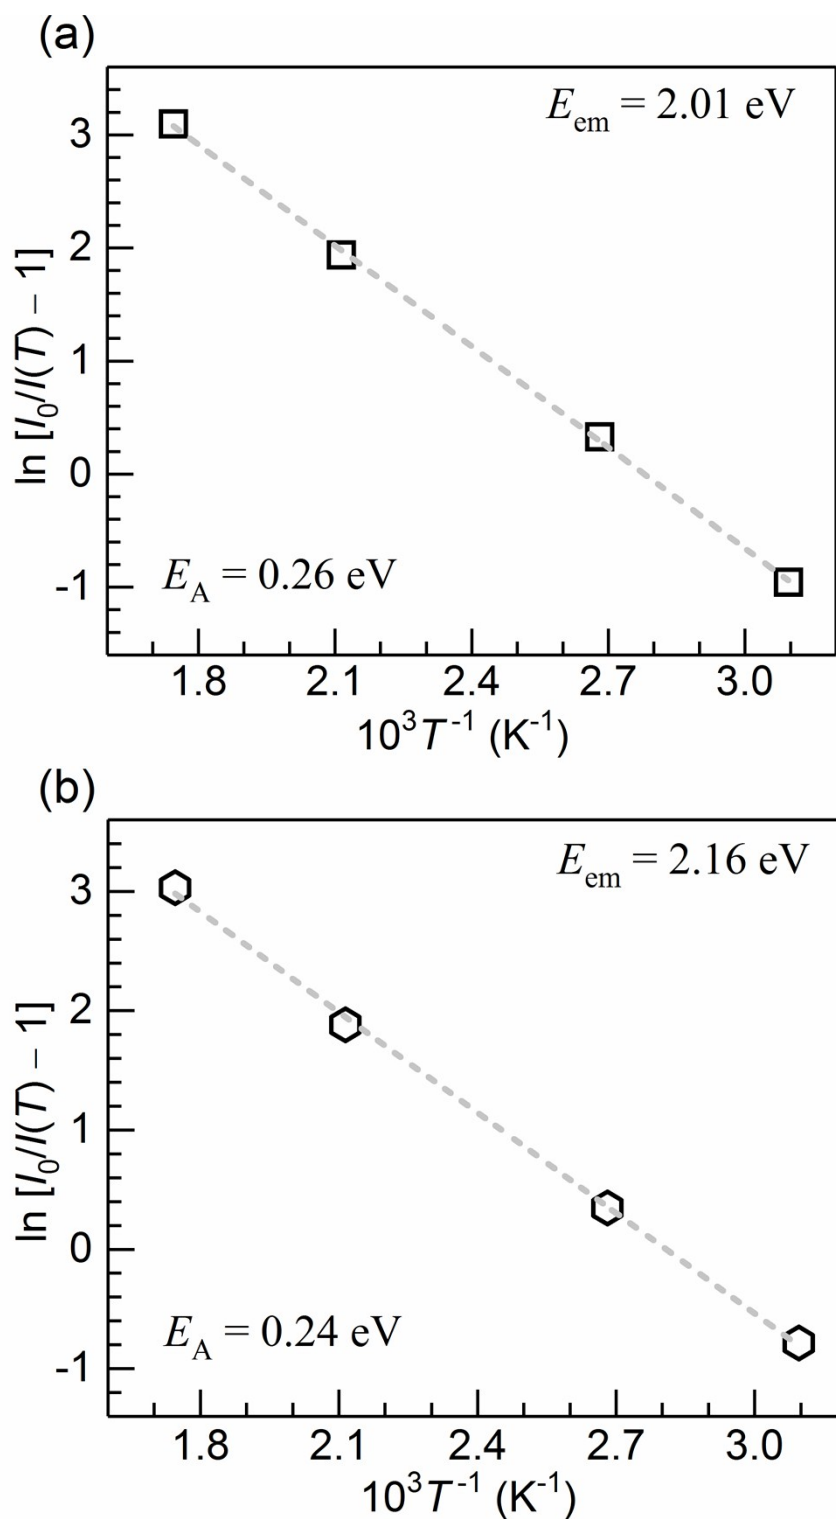

**Fig. S2.** Plots of  $\ln[I_0/I(T) - 1]$  vs. reciprocal temperature for the CuSn precursor glass obtained for  $\text{Cu}^+$  photon emission monitored at (a) 2.01 eV, and (b) 2.16 eV; the dashed lines are linear fits to the data.
